# Supplementary material for: Model-Based Design of Experiments for adsorption isotherms
Source: Research Square preprint supplement (doi:10.21203/rs.3.rs-6765590/v1), 2025-06-04
Supplement: Supplementary file 1 [file 09b6805e1bd057debbf6fb36.xlsx]

## Sheet: Type I
Adsorbent:	Levatit VP OC 1065
Vapor/Gas:	CO2
Reference						MBdoE
T=25°C		T=75°C		T=100°C		T=25°C		T=75°C		T=100°C
p / bar	X / g/g	p / bar	X / g/g	p / bar	X / g/g	p / bar	X / g/g	p / bar	X / g/g	p / bar	X / g/g
0.00375328	8.19004e-05	0.0341518	0.0192204	0.00375982	0.00063197	0.001	0	0.4951	0.06796	0.508	0.0333
0.0479043	0.0834807	0.111693	0.0371128	0.0688974	0.0084986	0.5042	0.117	0.182	0.0456
0.10819	0.0944551	0.224025	0.0484863	0.0686939	0.00861155	0.9999	0.126	0.819	0.0699
0.214498	0.102165	0.341311	0.0556795	0.13916	0.015141	0.1144	0.095
0.289712	0.1059	0.414748	0.0591586	0.209602	0.0202725
0.367454	0.109715	0.53662	0.063544	0.327228	0.0268876
0.44582	0.112428	0.612231	0.0659754	0.445876	0.0321348
0.514962	0.11521	0.736222	0.0691874	0.519067	0.0350067
0.594118	0.117257	0.811987	0.0711015	0.640159	0.0386863
0.664239	0.119209	0.936363	0.0735543	0.713986	0.0410231
0.744654	0.121121	1.01397	0.0750797	0.836386	0.0440096
0.810888	0.122747			0.911174	0.0457649
0.893373	0.124514			0.98866	0.0479074
0.968012	0.126168

## Sheet: Type III
Adsorbent:	Levatit VP OC 1065
Vapor/Gas:	H2O
Reference						MBdoE
T=25°C		T=50°C		T=75°C		T=25°C		T=50°C		T=75°C
p_rel / Pa/Pa	X / g/g	p_rel / Pa/Pa	X / g/g	p_rel / Pa/Pa	X / g/g	p_rel / Pa/Pa	X / g/g	p_rel / Pa/Pa	X / g/g	p_rel / Pa/Pa	X / g/g
0.11074	0.0112175	0.0477741	0.00580452	0.0500966	0.00711491	0	0	0.486	0.059	0.486	0.0484
0.263359	0.0262629	0.0989669	0.0114448	0.0998091	0.0119459	0.4984	0.05603	0.1992	0.02404
0.384968	0.0397881	0.199212	0.0240431	0.208239	0.0225392	0.8644	0.157	0.8406	0.136
0.493855	0.0573943	0.296085	0.0336977	0.304177	0.0319649	0.5913	0.0881	0.09897	0.0114
0.583569	0.0745698	0.384571	0.0463843	0.401713	0.0432617
0.655959	0.0947374	0.470128	0.0598423	0.503525	0.0536673
0.721968	0.11134	0.598211	0.0776982	0.592005	0.0657074
0.795202	0.135807	0.673777	0.0948887	0.637666	0.0734122
0.824007	0.149025	0.813691	0.135064	0.684923	0.0839713
				0.782634	0.10414
				0.832767	0.124617
				0.891756	0.144611

## Sheet: Type V
Adsorbent:	BAM-P109
Vapor/Gas:	H2O
Reference						MBdoE
T=25°C		T=50°C		T=80°C		T=25°C		T=50°C		T=80°C
p_rel / Pa/Pa	X / g/g	p_rel / Pa/Pa	X / g/g	p_rel / Pa/Pa	X / g/g	p_rel / Pa/Pa	X / g/g	p_rel / Pa/Pa	X / g/g	p_rel / Pa/Pa	X / g/g
0.135362	0.000840499	0.0735599	0.0012261	0.0689531	0.00135944	0.01	0	0.529	0.0516	0.4936	0.0291
0.182657	0.00144842	0.12802	0.00158112	0.117024	0.0019328	0.4953	0.03388	0.6597	0.3493
0.239528	0.00196345	0.183665	0.00216707	0.161536	0.00241856	0.8937	0.4232	0.854	0.4112
0.281915	0.00262598	0.209846	0.00249354	0.205604	0.00298646	0.4625	0.019
0.332522	0.00371576	0.273855	0.00341457	0.253903	0.00371606	0.604	0.2108
0.383099	0.00575119	0.320382	0.00434743	0.302973	0.00455908
0.433427	0.0103377	0.370689	0.00590443	0.356238	0.0057954
0.481662	0.0220815	0.420362	0.00862576	0.402588	0.00728086
0.533867	0.0534337	0.463472	0.0150831	0.451077	0.00974555
0.580482	0.152863	0.558872	0.0740222	0.506074	0.0228431
0.633904	0.29228	0.608848	0.196456	0.546526	0.0425064
0.68833	0.367576	0.664176	0.322007	0.601202	0.12463
0.728406	0.393282	0.710968	0.373875	0.647917	0.261412
0.822962	0.41256	0.760073	0.391243	0.698919	0.353679
0.921334	0.420614	0.816918	0.401068	0.757062	0.381498
		0.868011	0.405892	0.807588	0.389101
